# Supplementary material
Source: ML conference proceedings conference paper supplement (https://openreview.net/forum?id=AecVG5CXdp)

### Rewards

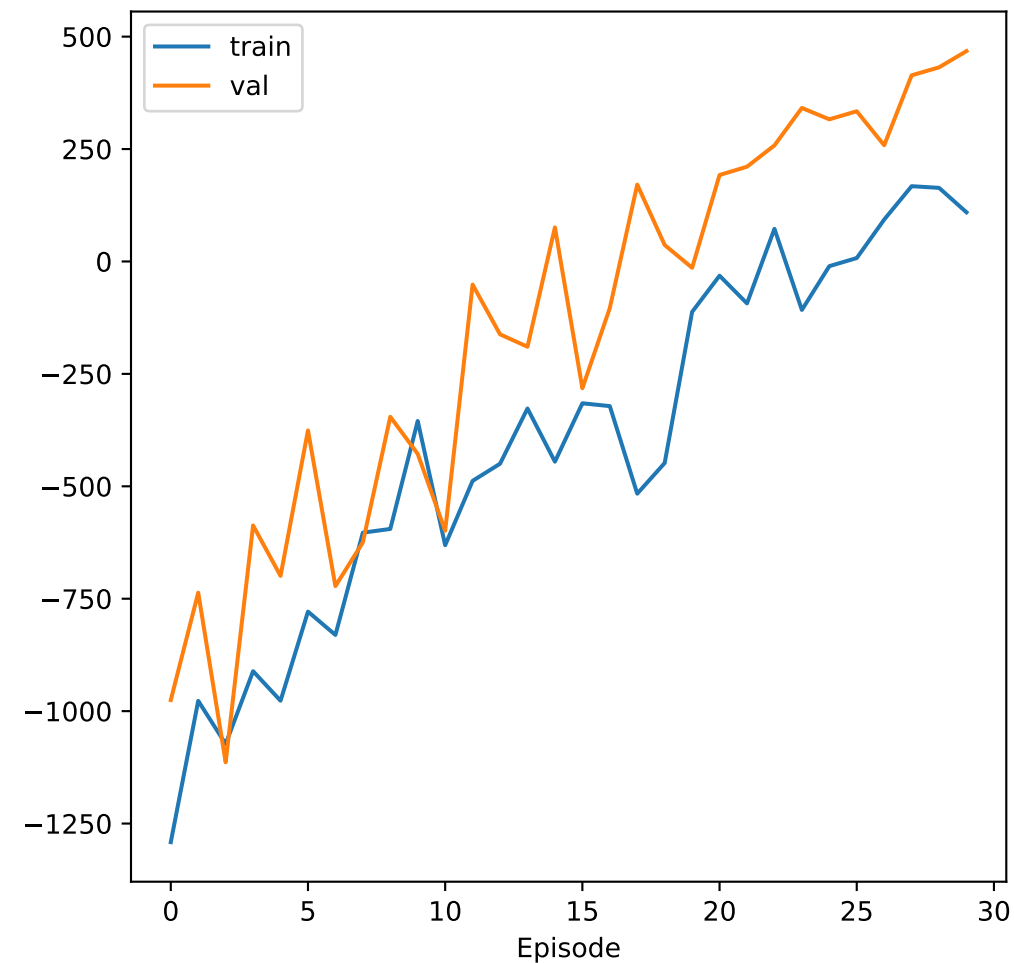

### Average waiting time per episode

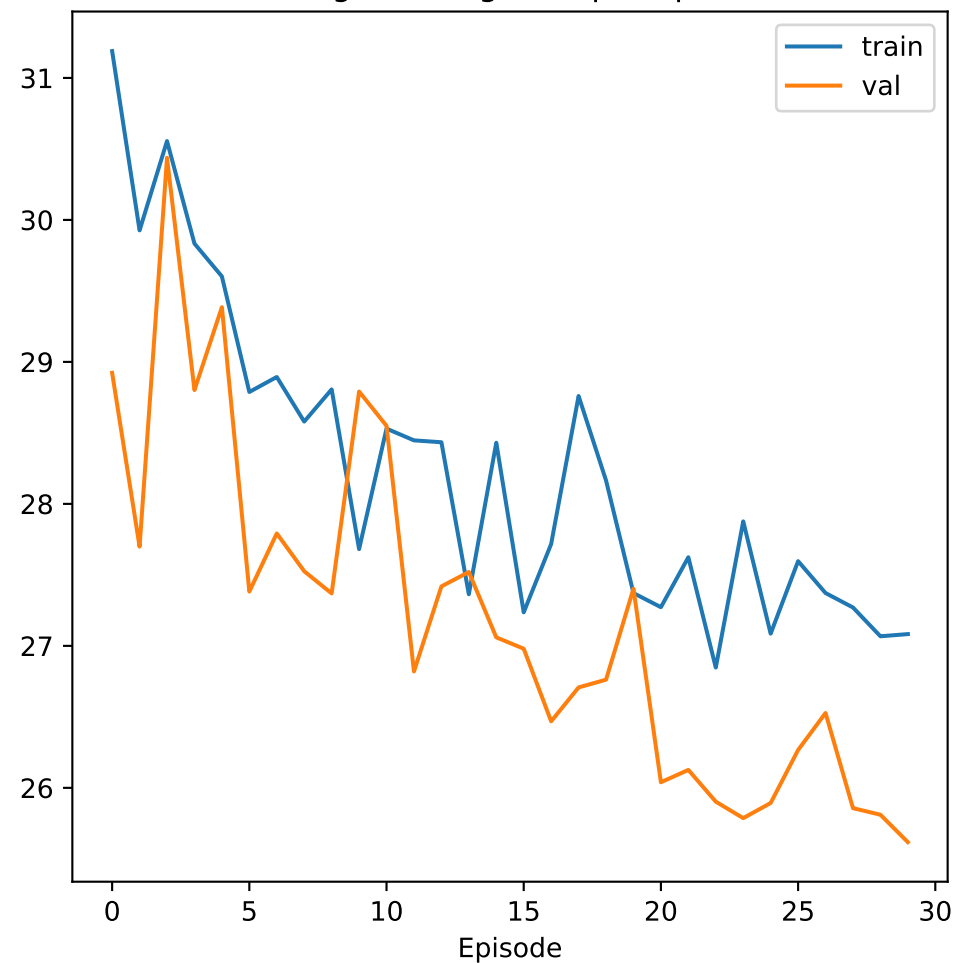

### Total energy consumption

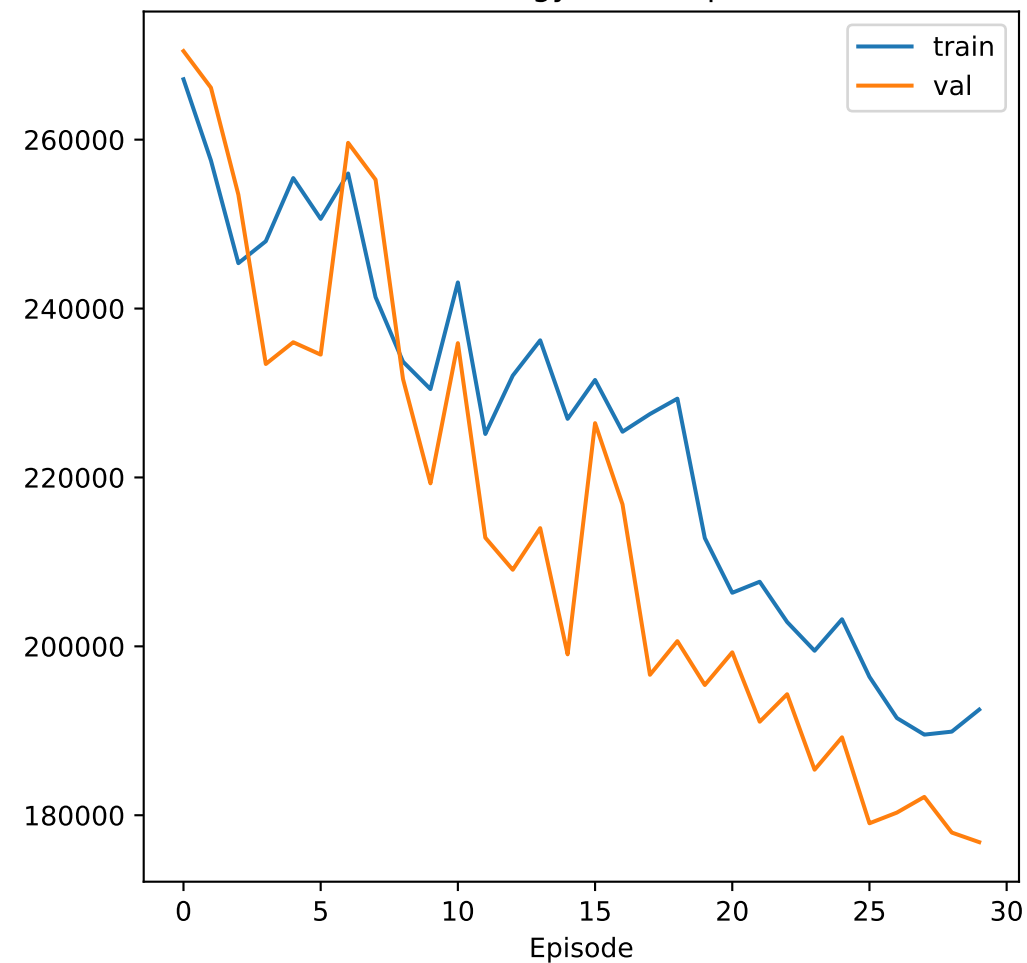

Supplement: supplementary_material [file attachment]

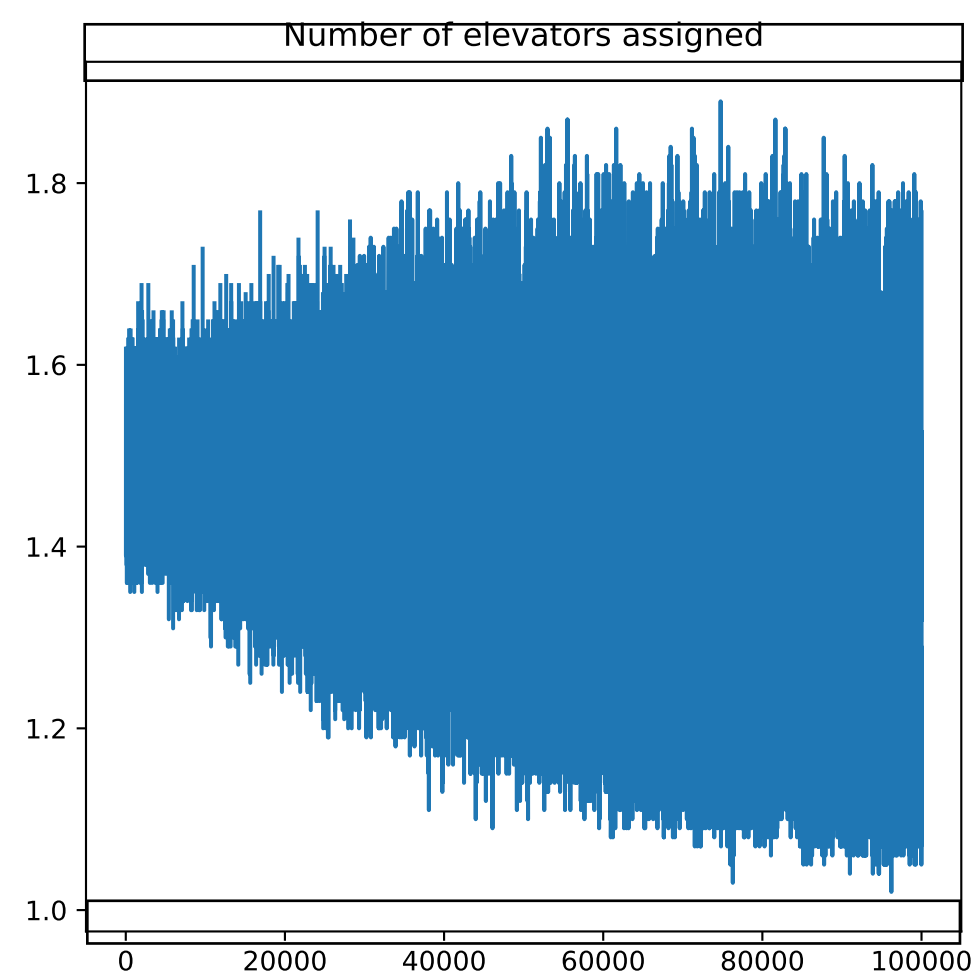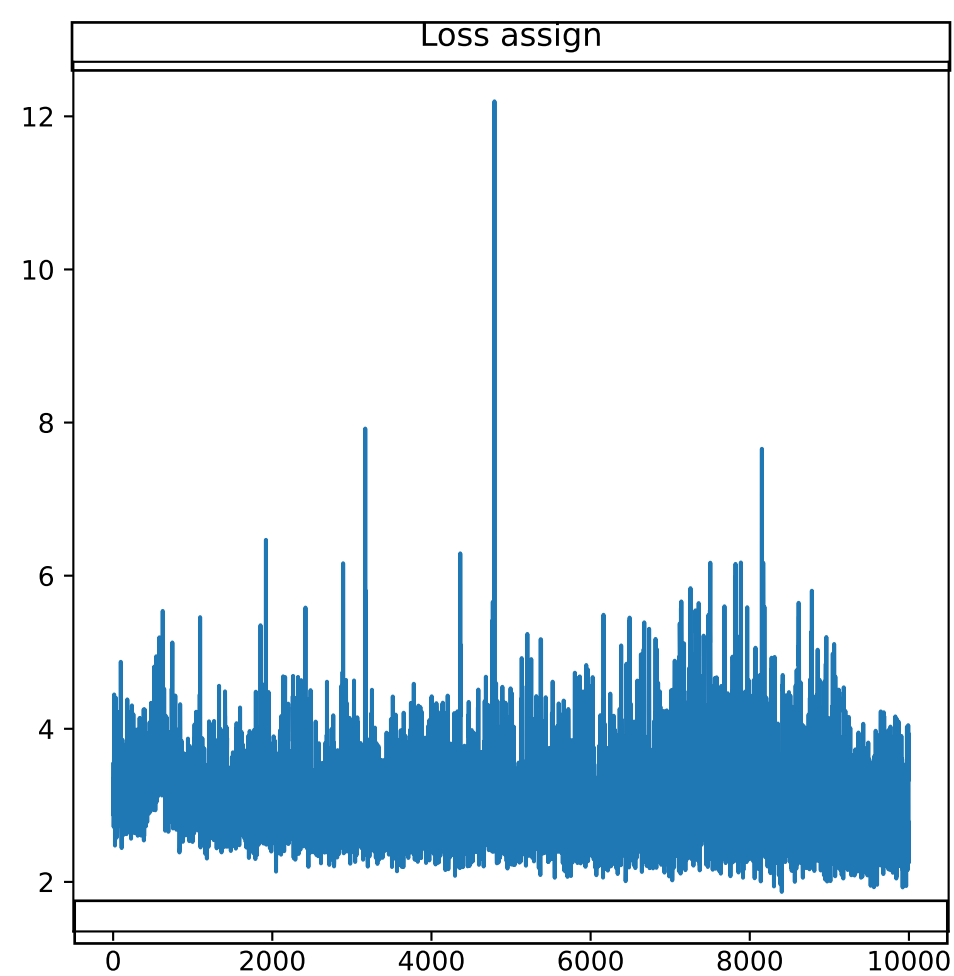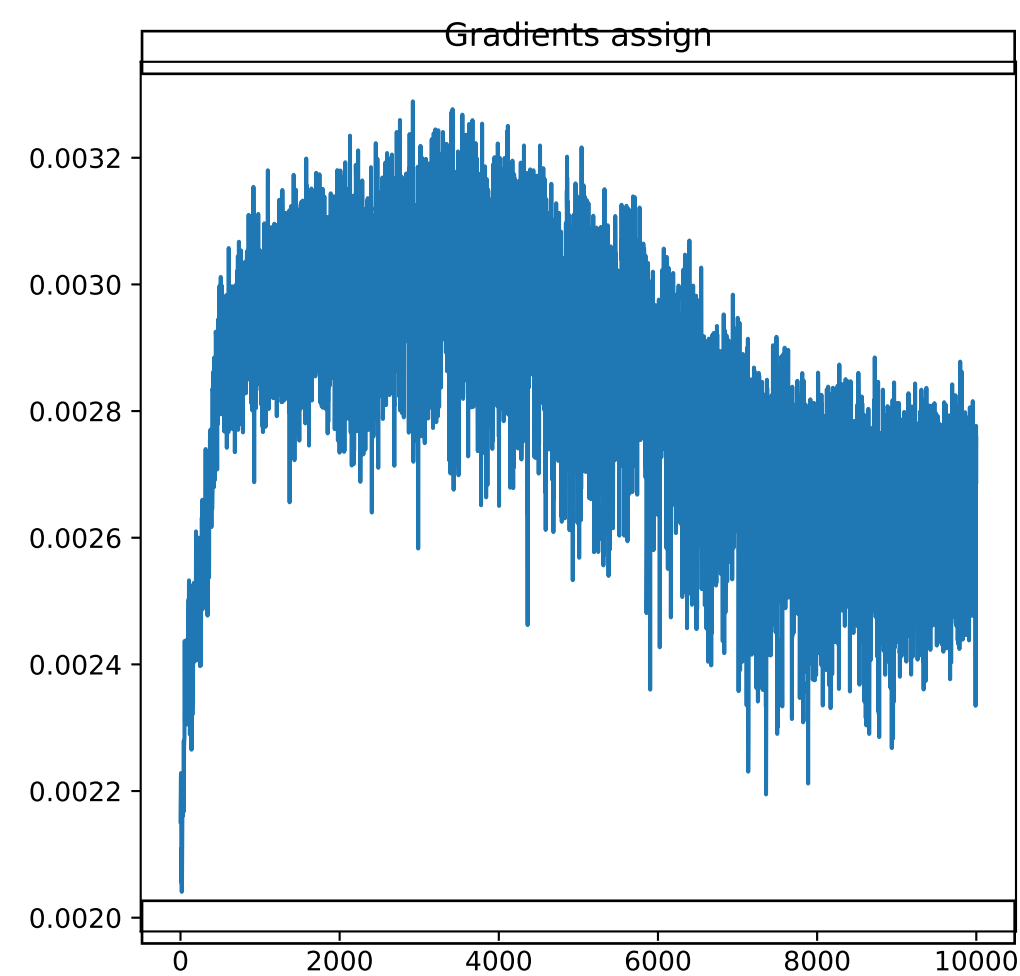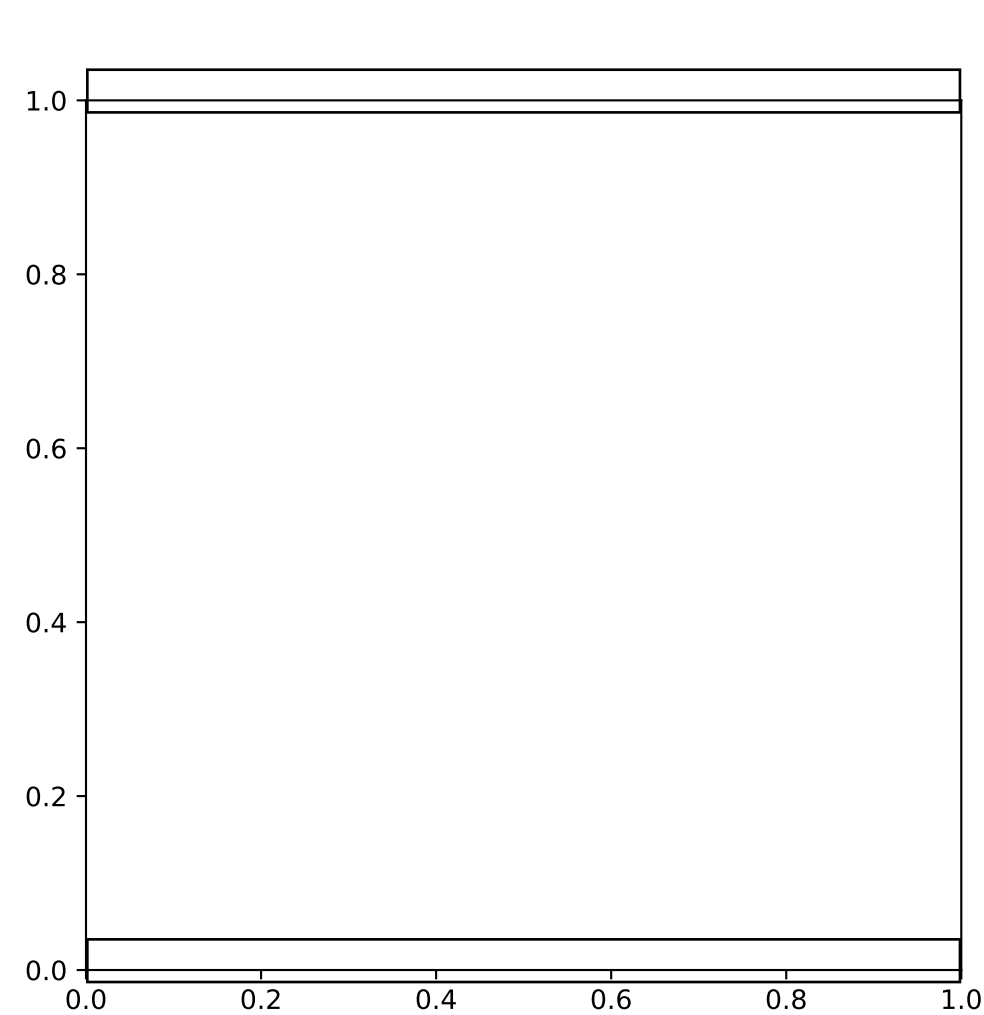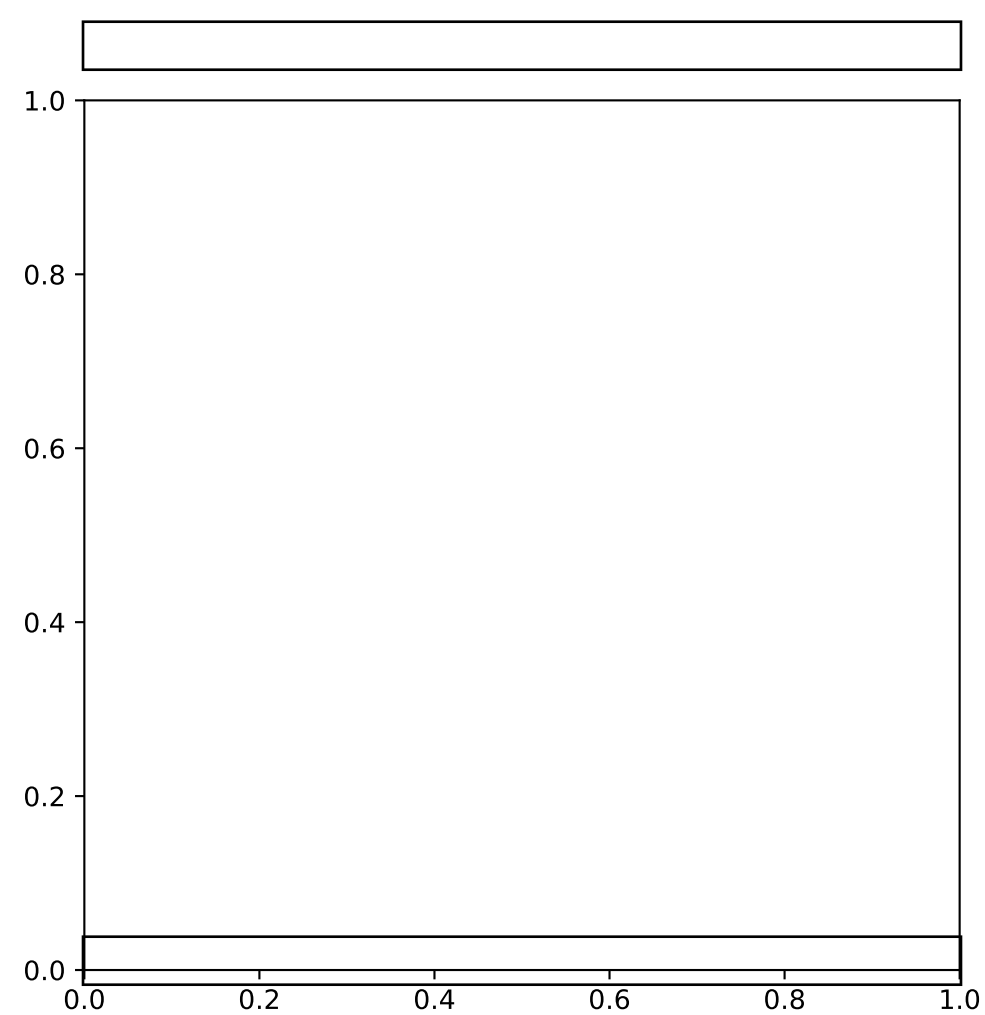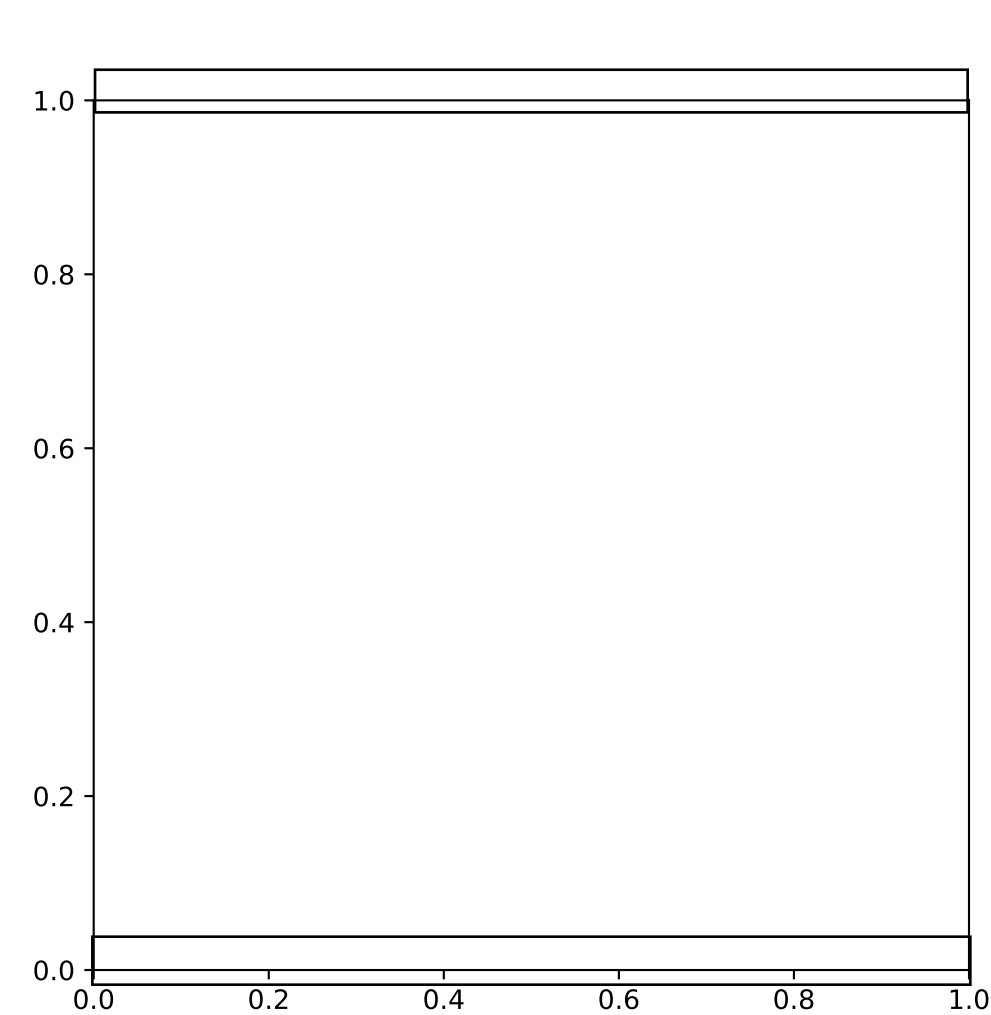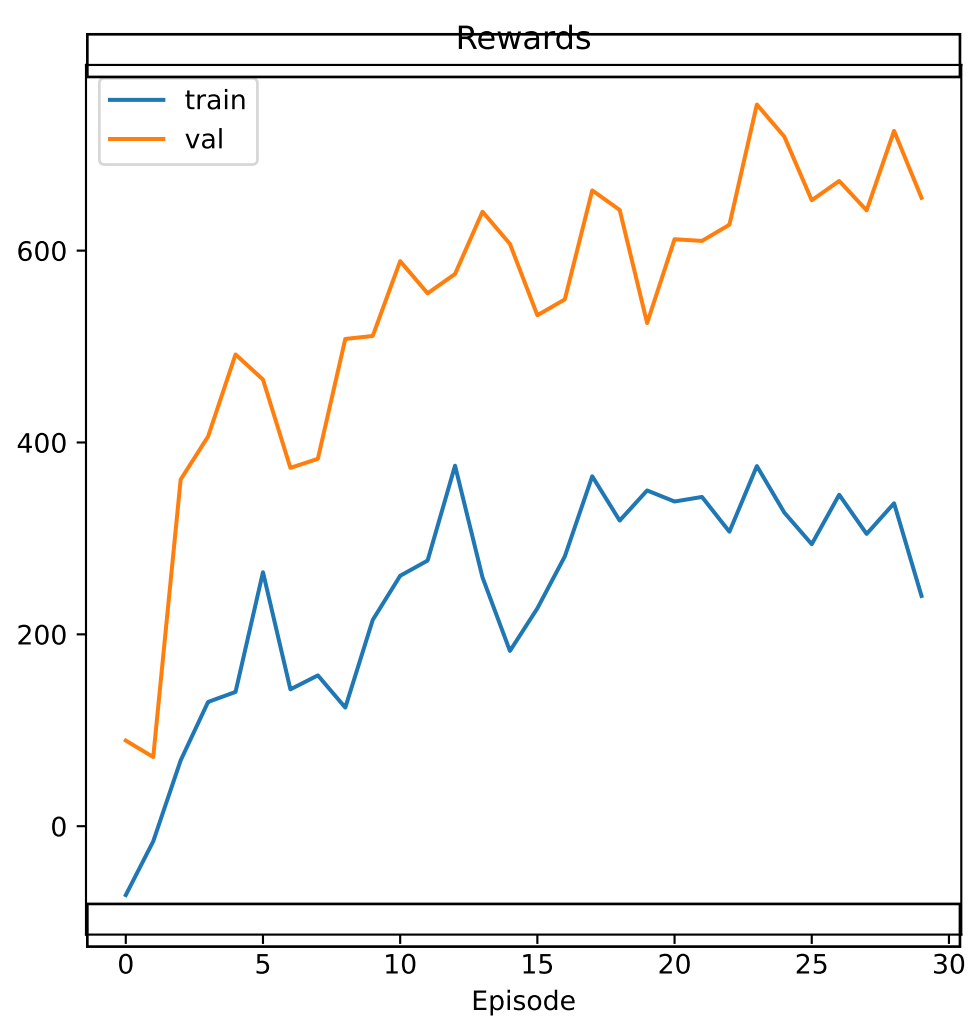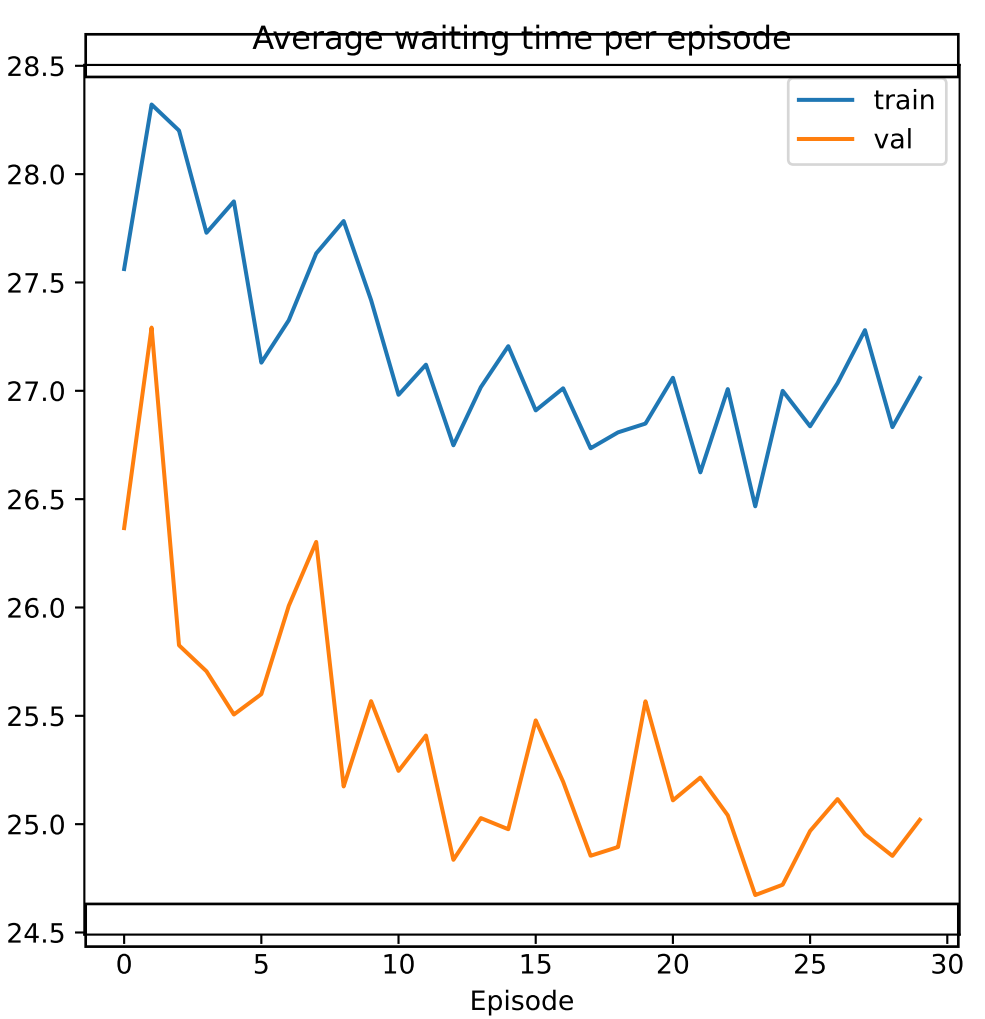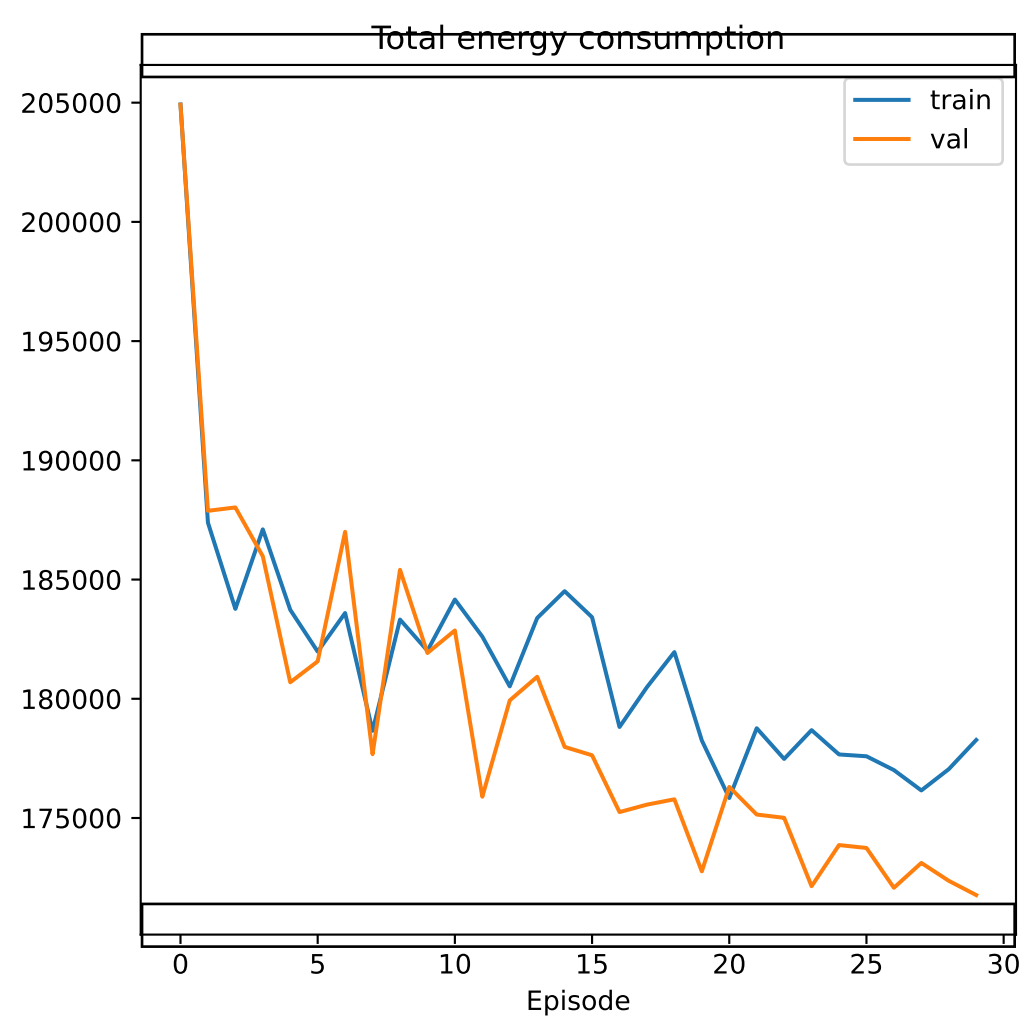

Supplement: supplementary_material [file attachment]

## Zoning matrix

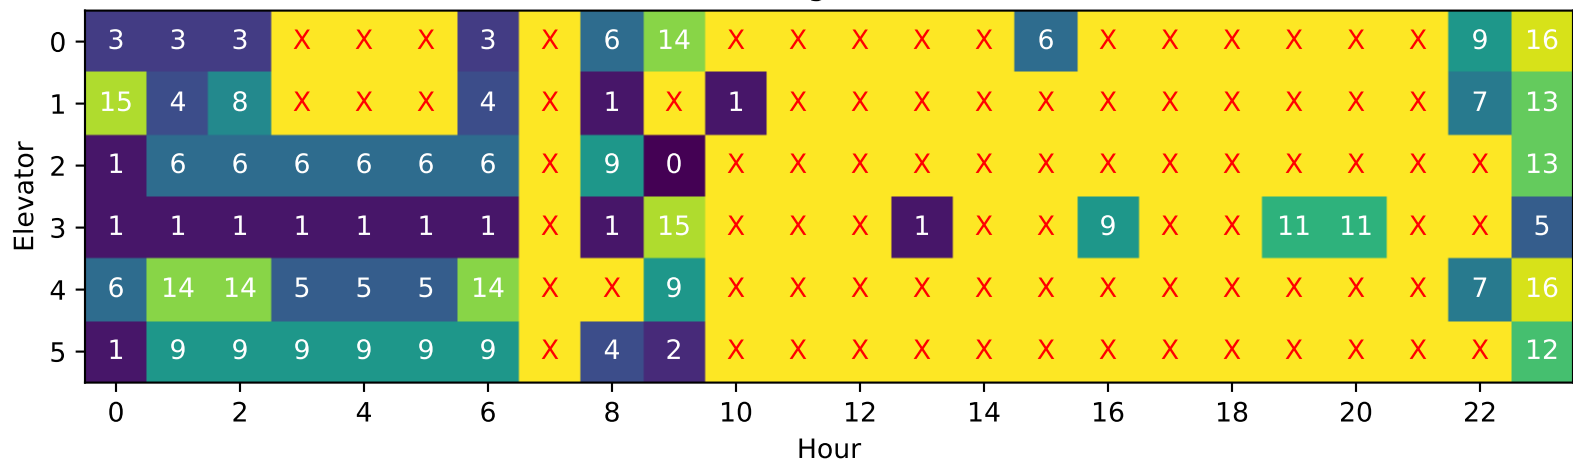

Supplement: supplementary_material [file attachment]
